# Supplementary material for: The influence of localized plasmons on the optical properties of Au/ZnO nanostructures
Source: Royal Society of Chemistry journal article supplement (doi:10.1039/c5tc00964b), 2015-01-01
Supplement: c5tc00964b1.pdf [file c5tc00964b1.pdf]

## Supporting Information

### The role of localized plasmons on the optical properties of Au/ZnO nanostructures

*R. Viter, Z. Balevicius, A. AbouChaaya, I. Baleviciute, S. Tumenas, L. Mikoliunaite, A. Ramanavicius, Z. Gertnere, A. Zalesska, V. Vataman, V. Smyntyna, D. Erts, P. Miele and M. Bechelany*

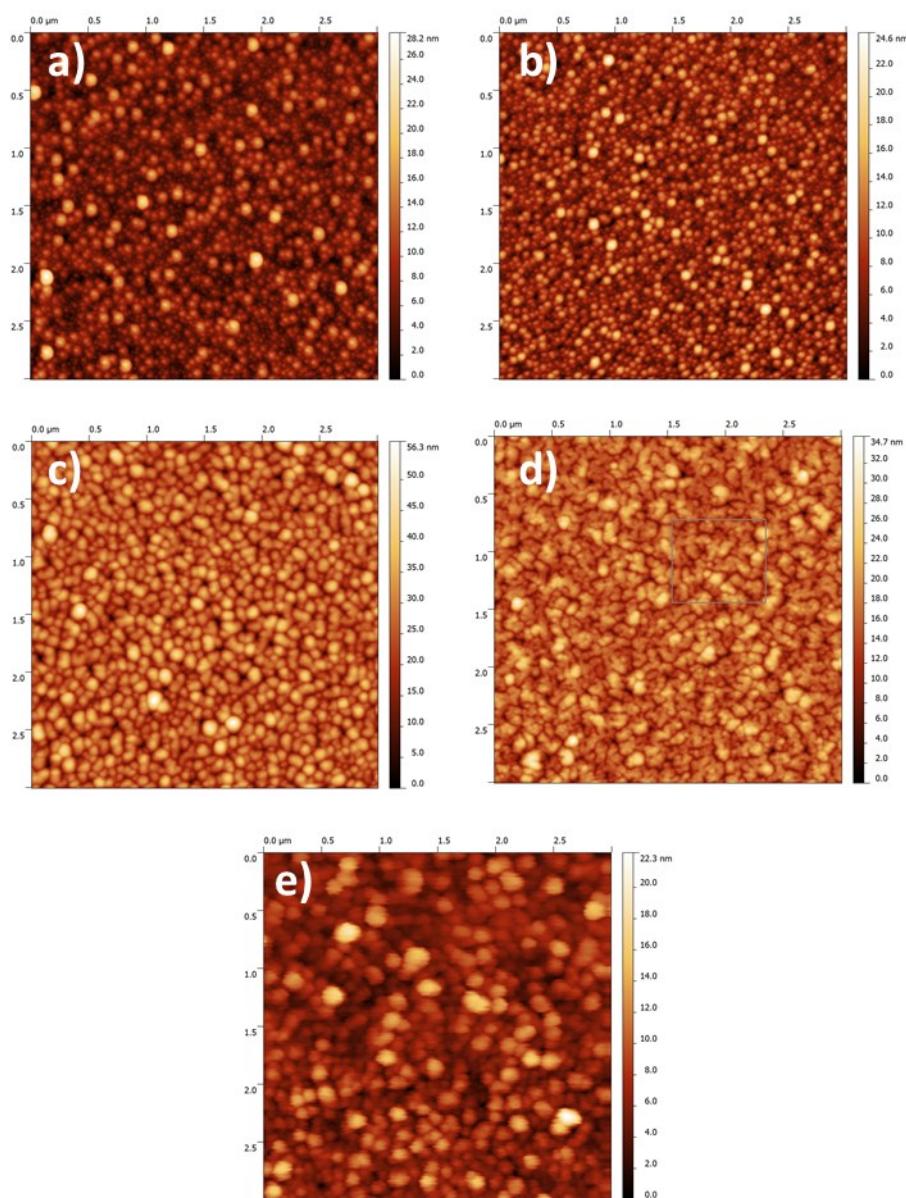

**Figure S11.** AFM of Au layers with different thickness: a) 2.5 nm, b) 5 nm, c) 10 nm, d) 15 nm and e) 30 nm

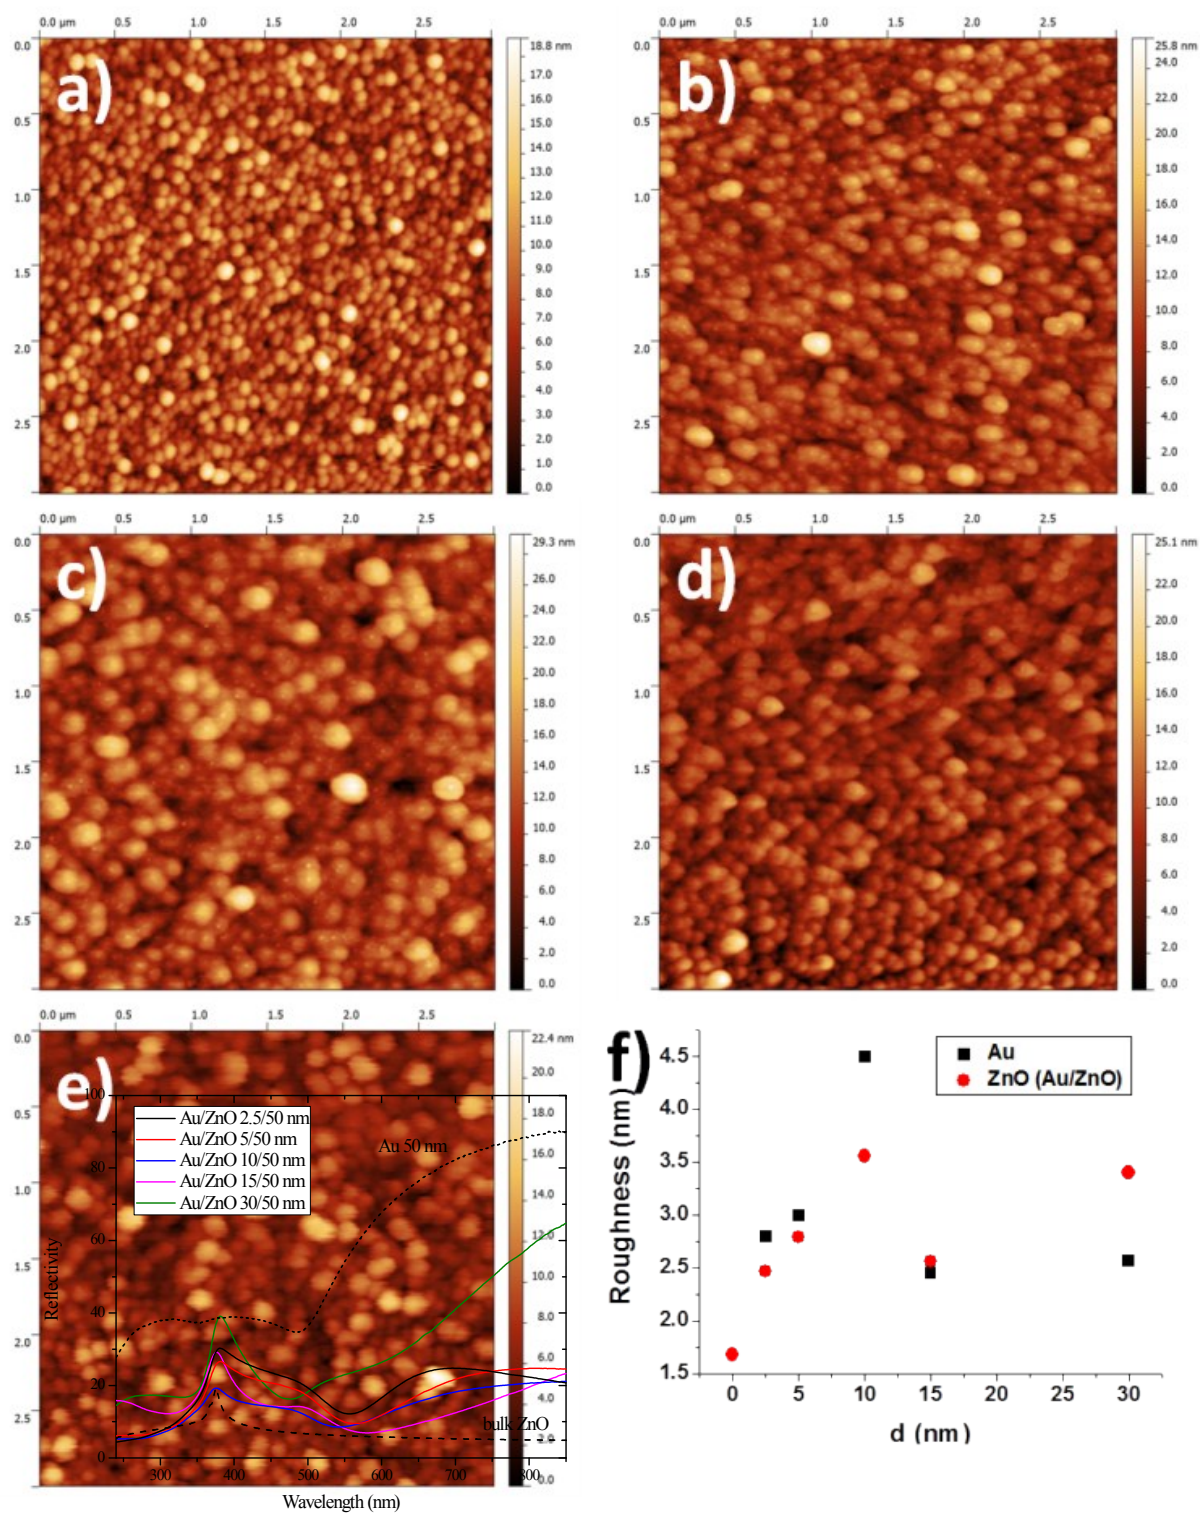

**Figure S12** AFM of Au-ZnO nanocomposites with different Au thickness: a) 2.5-50 nm, b) 5-50 nm, c) 10-50 nm, d) 15-50 nm and e) 30-50 nm; f) Roughness dependence as a function of the Au film thickness

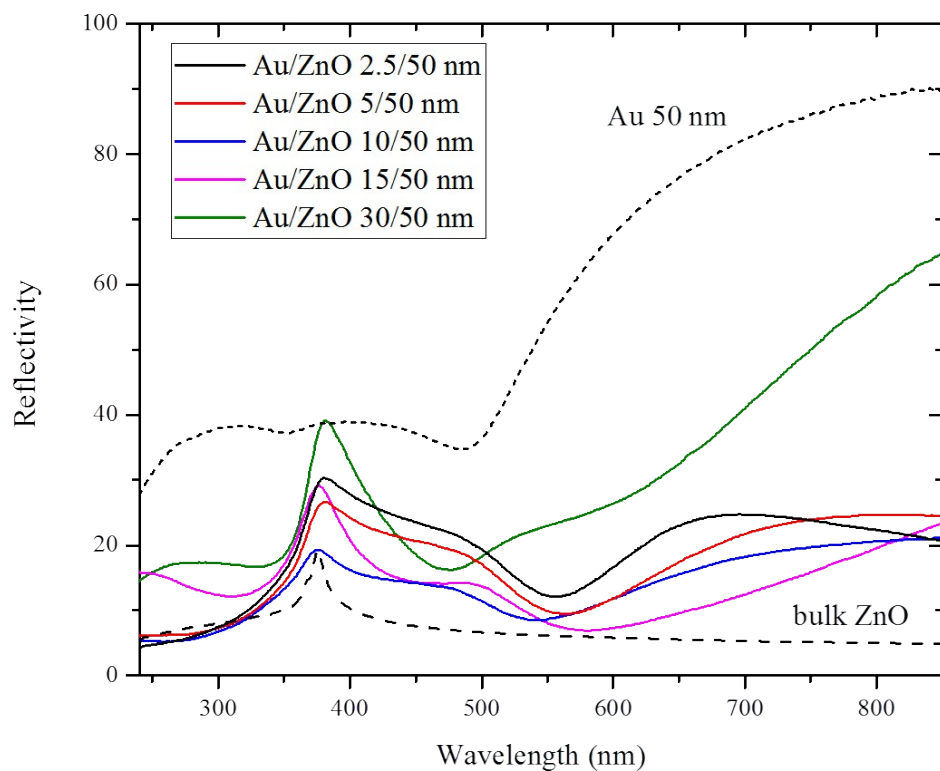

**Figure S13.** UV-VIS reflection spectra of Au-ZnO nanostructures with different Au thicknesses. Dashed and dotted curves present, for a comparison absorption spectra of bulk ZnO and Au (~50 nm).
